# Supplementary material
Source: PubMed Central journal article supplement (PMC6309676)
Supplement: NIHMS999339-supplement-Supp.pdf [file NIHMS999339-supplement-Supp.pdf]

|                 |                                                                 |
|-----------------|-----------------------------------------------------------------|
| <i>MjaTFIIB</i> | SVDYNEPIIIKENGEIKVVKIGELIDKIIIE-NSENIRREGILE---IAKCKGIEVIAFNS   |
| <i>MvuTFIIB</i> | SVDYSEPIIIKEKGEIKVVKIGELIDEIIEK-NSKNVRKDGILE---IARCKDVEVIAFDS   |
| 2cw7            | SILPEEWLPVLEEVEHFVFRIGELIDRMEENAGVKREGETE---VLEVSGLEVSPFNR      |
| 1dq3            | CIDGKAKIIFENEGEEHLLTMEEMYERYKH-L-GEFYDEEYNRWGIDVSNVPIYVKSFD     |
| <i>MjaTFIIB</i> | NY-KFKFMPVSEVSRHPVS---EMFEIVVEGNKKVVRVTRSHSVFTI-RDNEVVPVIRVDEL  |
| <i>MvuTFIIB</i> | NY-KFKFMPVSEVSRHPVS---EMFEIVVEGNKKVVRVTRSHSVFTV-KDNEVVPVIRVDDL  |
| 2cw7            | RTNKAEELKRVKALIRHDYSG--KVYTIIRLKSGRRIKITSGHSLFSV-RNGELVEVTGDEL  |
| 1dq3            | ESKRUVKGVNVIWKYELGKDVTKYEIITNKGTKILTSPWHPPFVLTPDFKIVEKRADEL     |
| <i>MjaTFIIB</i> | KVGDILVLAKELPNIEEDIE--ID-----KFF---SKILGY                       |
| <i>MvuTFIIB</i> | RVGDILVLAKELPNIEEENA--ID-----KFF---AKILAY                       |
| 2cw7            | KPGDLVAVPRRLELPERNHVNLVLELLGTPEETLDIVMTIPVKGKKNFFKGLRTRLRW      |
| 1dq3            | KEGDILIGG--MPDGEDY-K--FI-----F-D---YWLAGF                       |
| <i>MjaTFIIB</i> | I IAE-----GYG-----DDKKI-----                                    |
| <i>MvuTFIIB</i> | IVSE-----GYG-----NEEKL-----                                     |
| 2cw7            | IFGEEKRPRRTARRYLRLHLEDLGYVRLKIGYEVLDWDSLKNYRRLYEALVE-----       |
| 1dq3            | IAGD-----CCF-----DKYHSHVKGHEYIY                                 |
| <i>MjaTFIIB</i> | -VLSYDYNE-----KEFIN---ET                                        |
| <i>MvuTFIIB</i> | -IFSFNCNK-----REVID---EV                                        |
| 2cw7            | -NVRYNKREYLVEFNSIRDVAVGIMPLKELKEWKIGTLNGFRMRKLIEVDESLE---KL     |
| 1dq3            | DRLRIYDYR-----IETFEIINDY                                        |
| <i>MjaTFIIB</i> | IDYFKSLN-----SDITIYSKDLNIQIEVKN-----KK                          |
| <i>MvuTFIIB</i> | ISYFKSLK-----SEISIYNKNSDIQIEVKD-----KE                          |
| 2cw7            | LGYYVSEGYARKQRNPKNWSYSVKLYNEDPEVLDDMERLASRFFGKVRGRNYVEIPKK      |
| 1dq3            | LEKTFGRK-----Y--SIQKDRNIYYIDIKA-----RN                          |
| <i>MjaTFIIB</i> | -I IIN-LLKKL-R--VKNKRIPSIIFKSPYIEIKKSFIDGIFNGKD-----A-----KV--- |
| <i>MvuTFIIB</i> | -I IIN-ILKKL-G--IENKRVPISIFKSPYGIKKSFDGLFNGKD-----T-----KI---   |
| 2cw7            | IGYL-LFENMCGVLAENKRIPEFVFTSPKGVRLAFLEGYFIDGDVHPNK-----RLRLS     |
| 1dq3            | -ITSHYLKLL-E--GIDNGIPPQILKEGKNAVLSFIAGLFDAEG-----HVSNKPGIELG    |
| <i>MjaTFIIB</i> | FVSKELAEDVIFLLLQIKENATINKKSINDIEVYEVVRI-----T--N-----           |
| <i>MvuTFIIB</i> | FTSKELAEDAIFLLLQIKENAILNKKI IKGISVYEVKRI-----P--N               |
| 2cw7            | TKSELLANQLVLLLN SVGVS AV--KLGHDSGVYRVYINEELPFVKLDKCK--N-----    |
| 1dq3            | MVNKRLIEDVTHYLNALGIKARIREKLRKDGIDYVLHVE-----EYSSLLRFYE          |
| <i>MjaTFIIB</i> | -----IY-----                                                    |
| <i>MvuTFIIB</i> | -----IY-----                                                    |
| 2cw7            | -----AYYSHVIPKEVLSEVFGKVFQKNVSPQTFRKMVED                        |
| 1dq3            | LIGKNLQNEEKREKLEKVLNSHHKGNFGLPLNFNAFKEWASEYGVFPTNGSQTIAIIND     |
| <i>MjaTFIIB</i> | -----TNRKLEKLINSDFIFLKIKEINKVEPT                                |
| <i>MvuTFIIB</i> | -----NNRKLEKLINSDFIFLKIKKINKVEPT                                |
| 2cw7            | GRLDPE-----KAQRLSWLIEGDVVLDRVESVD-VEDY                          |
| 1dq3            | ERISLGQWHTRNRVSKAVLVKMLRKL YEATKDEEVKRLHLIEG---LEVVRHIT-TTNE    |
| <i>MjaTFIIB</i> | SGYAYDLTVPNAENFVAG-FGGFVLHN/T                                   |
| <i>MvuTFIIB</i> | NGYAYDLTVPNAENFIAG-FGGFVLHN/T                                   |
| 2cw7            | DGYVYDLSVEDNENFLVG-FGLVYAHN/                                    |
| 1dq3            | PRTFYDLTVENYQNYLAGENGMIFVHN/                                    |

**Supplementary Fig. 1: A sequence alignment used for modelling**
